# Supplementary material
Source: MDPI journal article supplement (https://www.mdpi.com/2071-1050/13/2/829)

# Do you agree with the basic distinction of developing the four components?

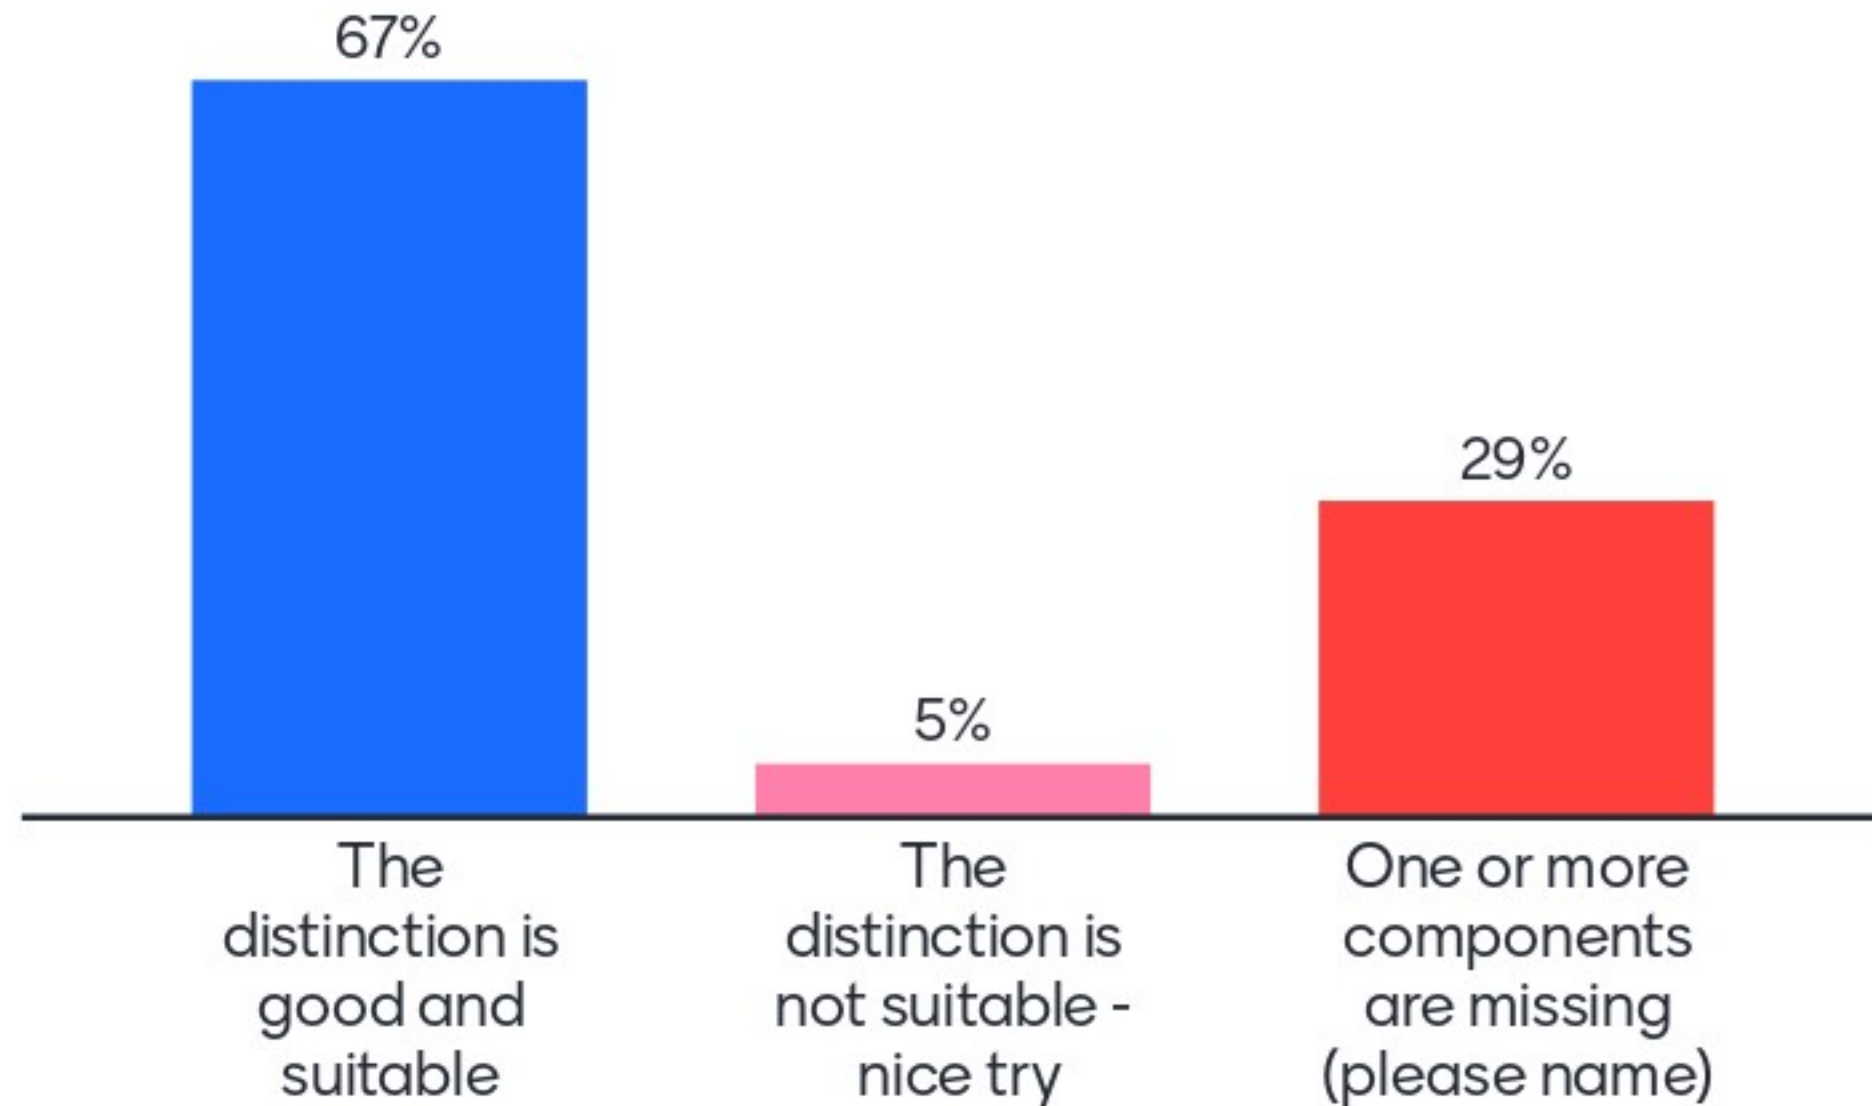

Are there different levels of importance between the components? Rate how important you consider each component for a succesful resettlement projects

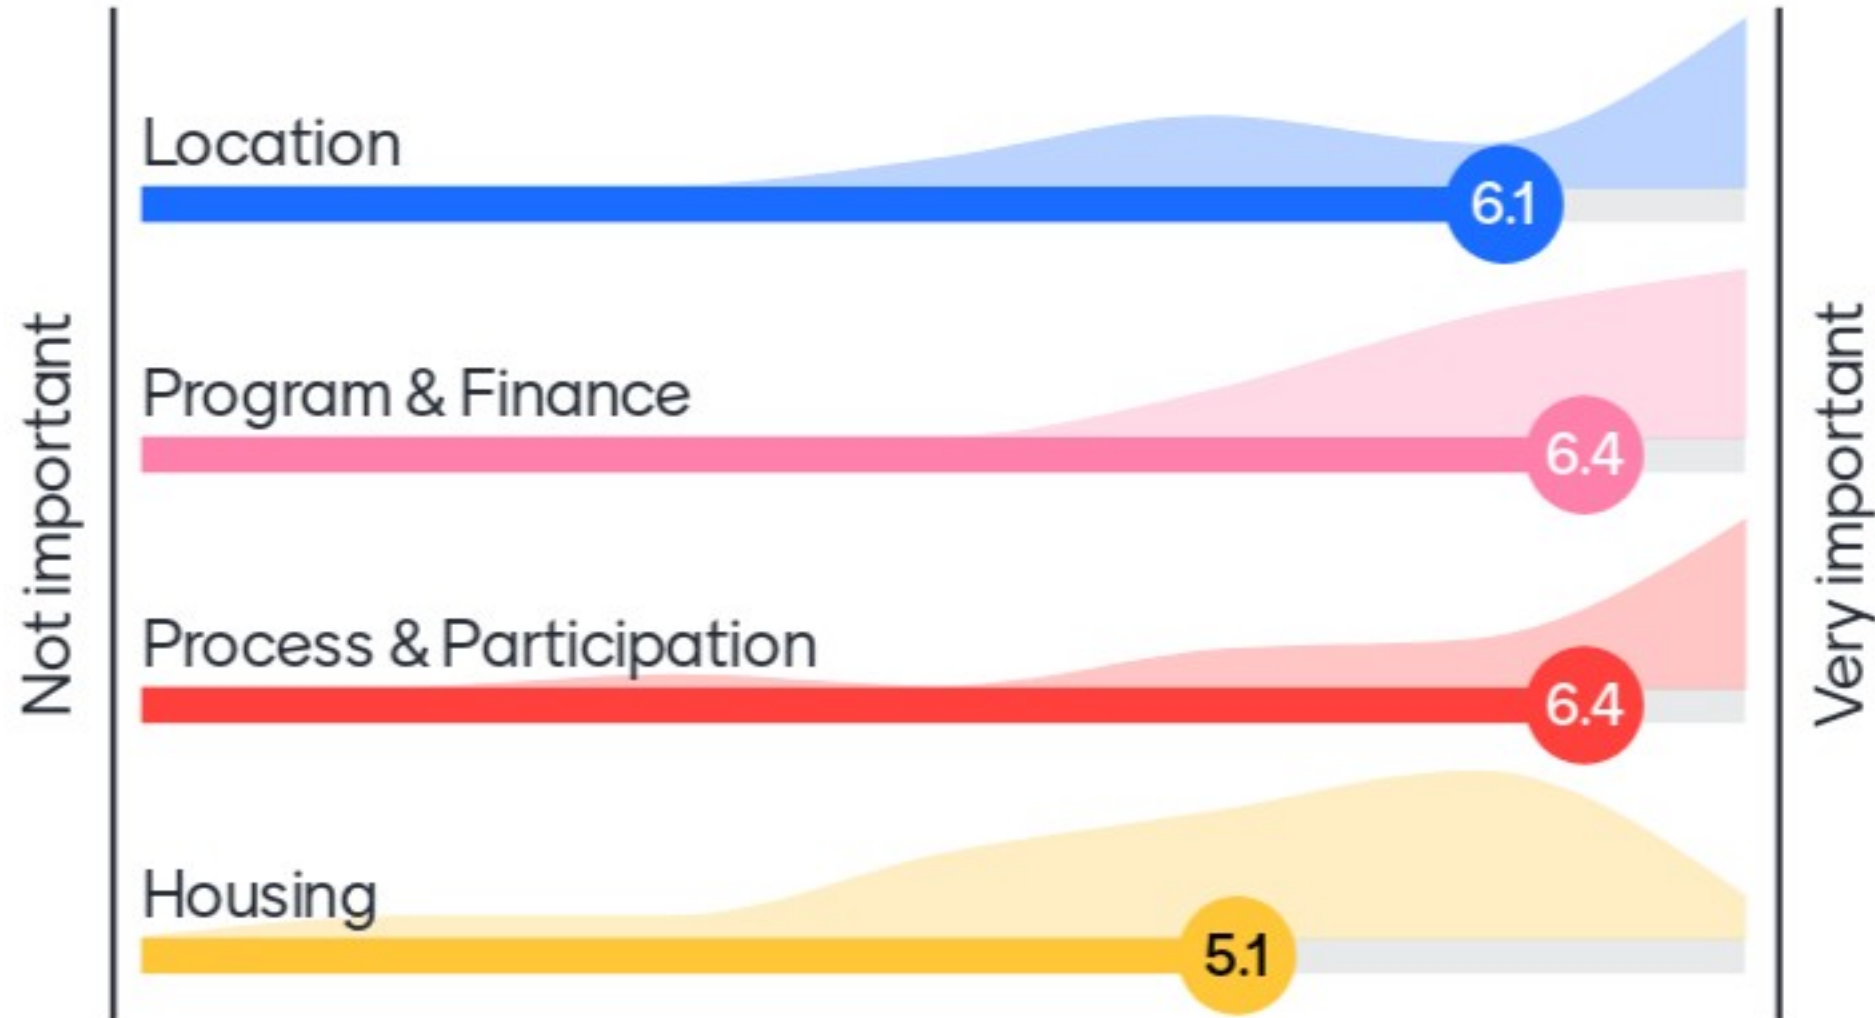

# Are the developed resettlement profiles suitable and representing reoccurring resettlement types?

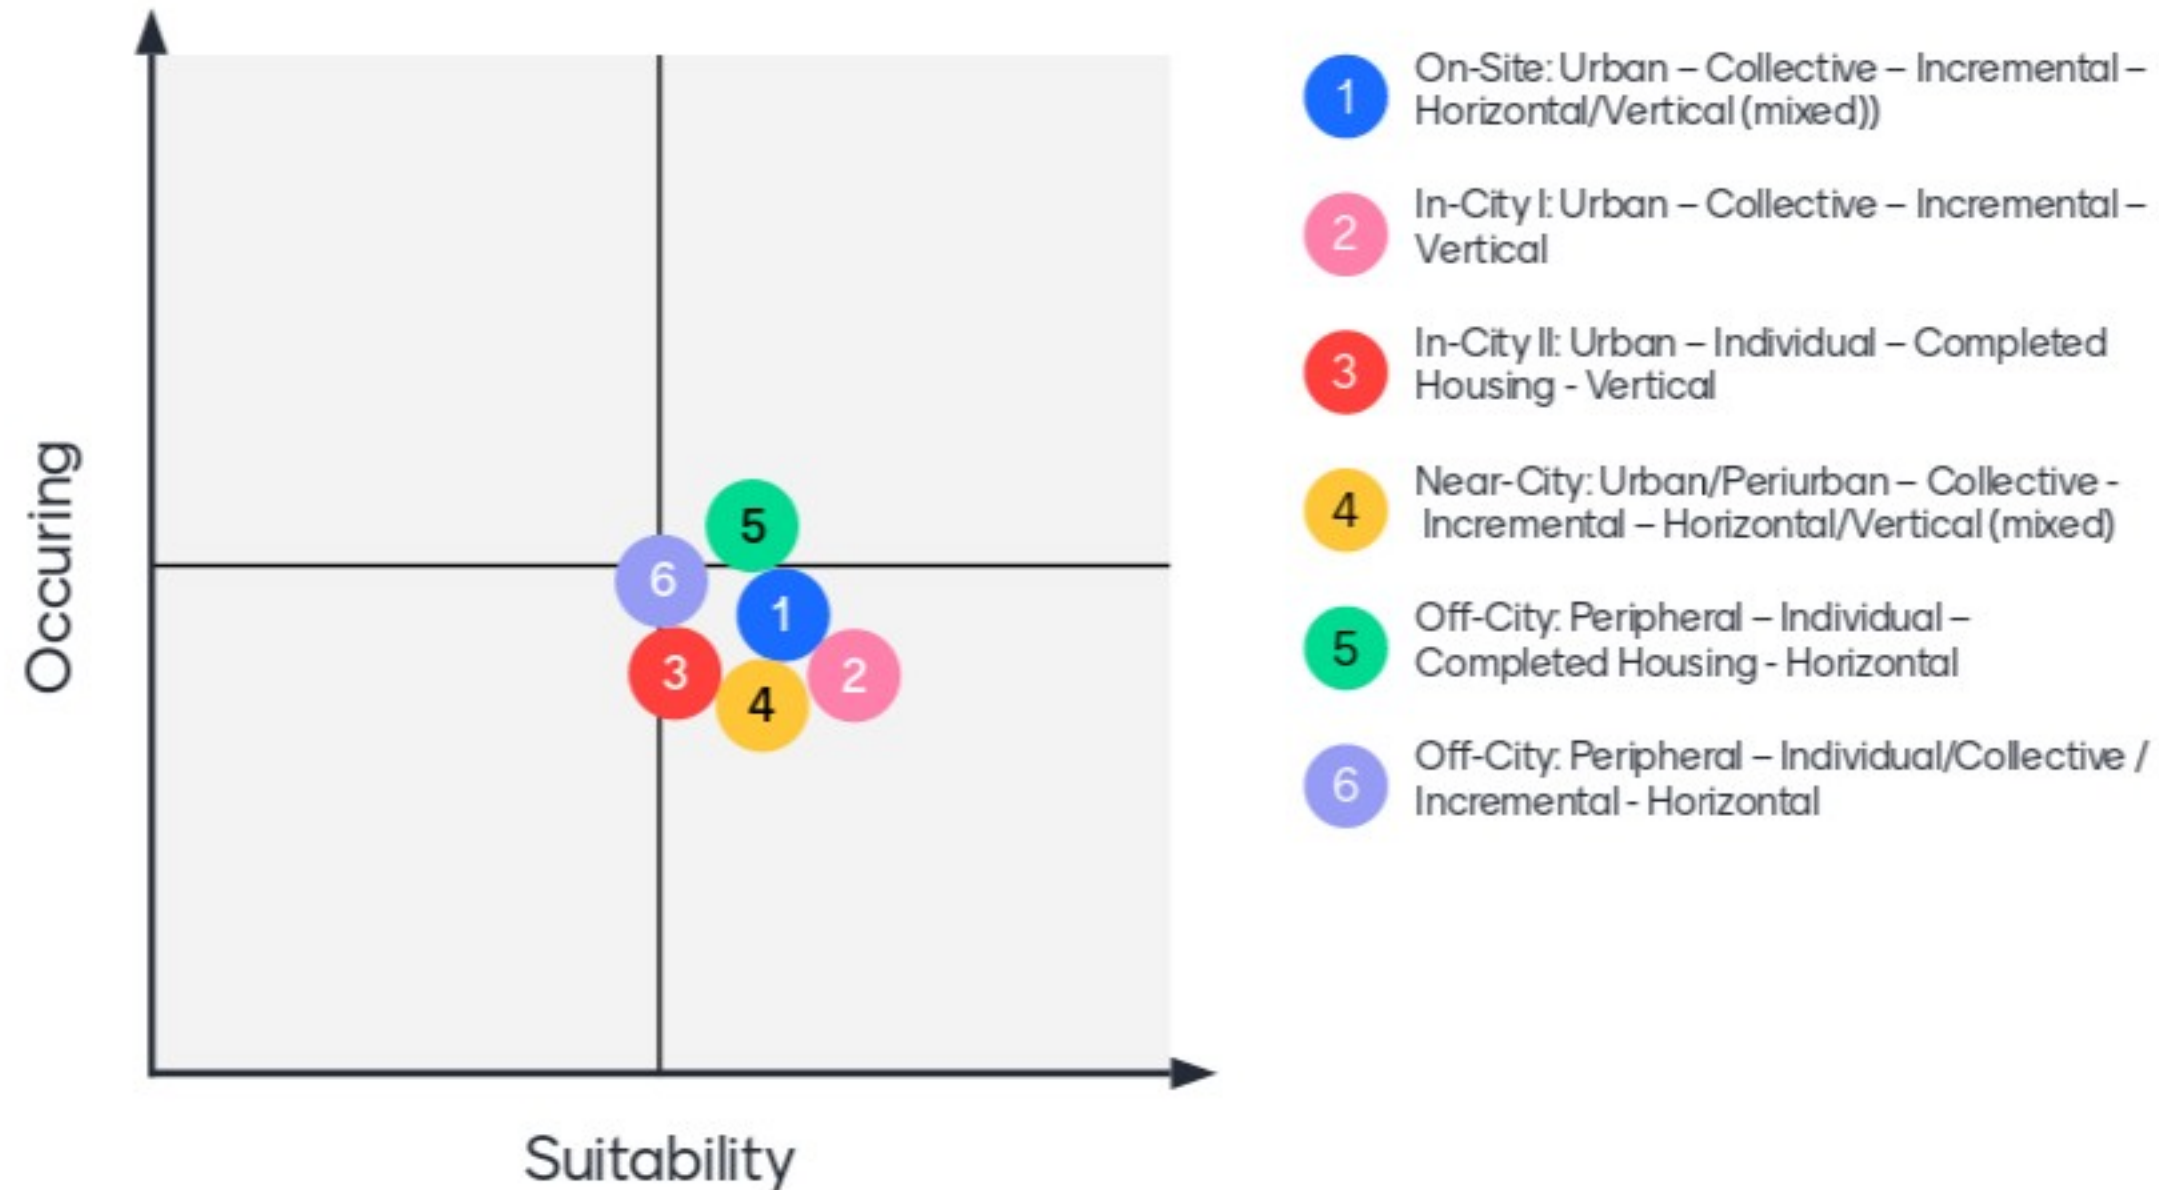

Supplement: s1 [file s1]
