# Supplementary material
Source: MDPI journal article supplement (https://www.mdpi.com/2071-1050/13/2/829)

 Mentimeter

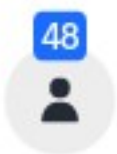

 Mentimeter

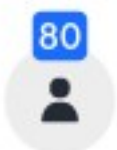



# Which indicators or topics do you consider important for the dimension 'Resilient Planning Regime'?

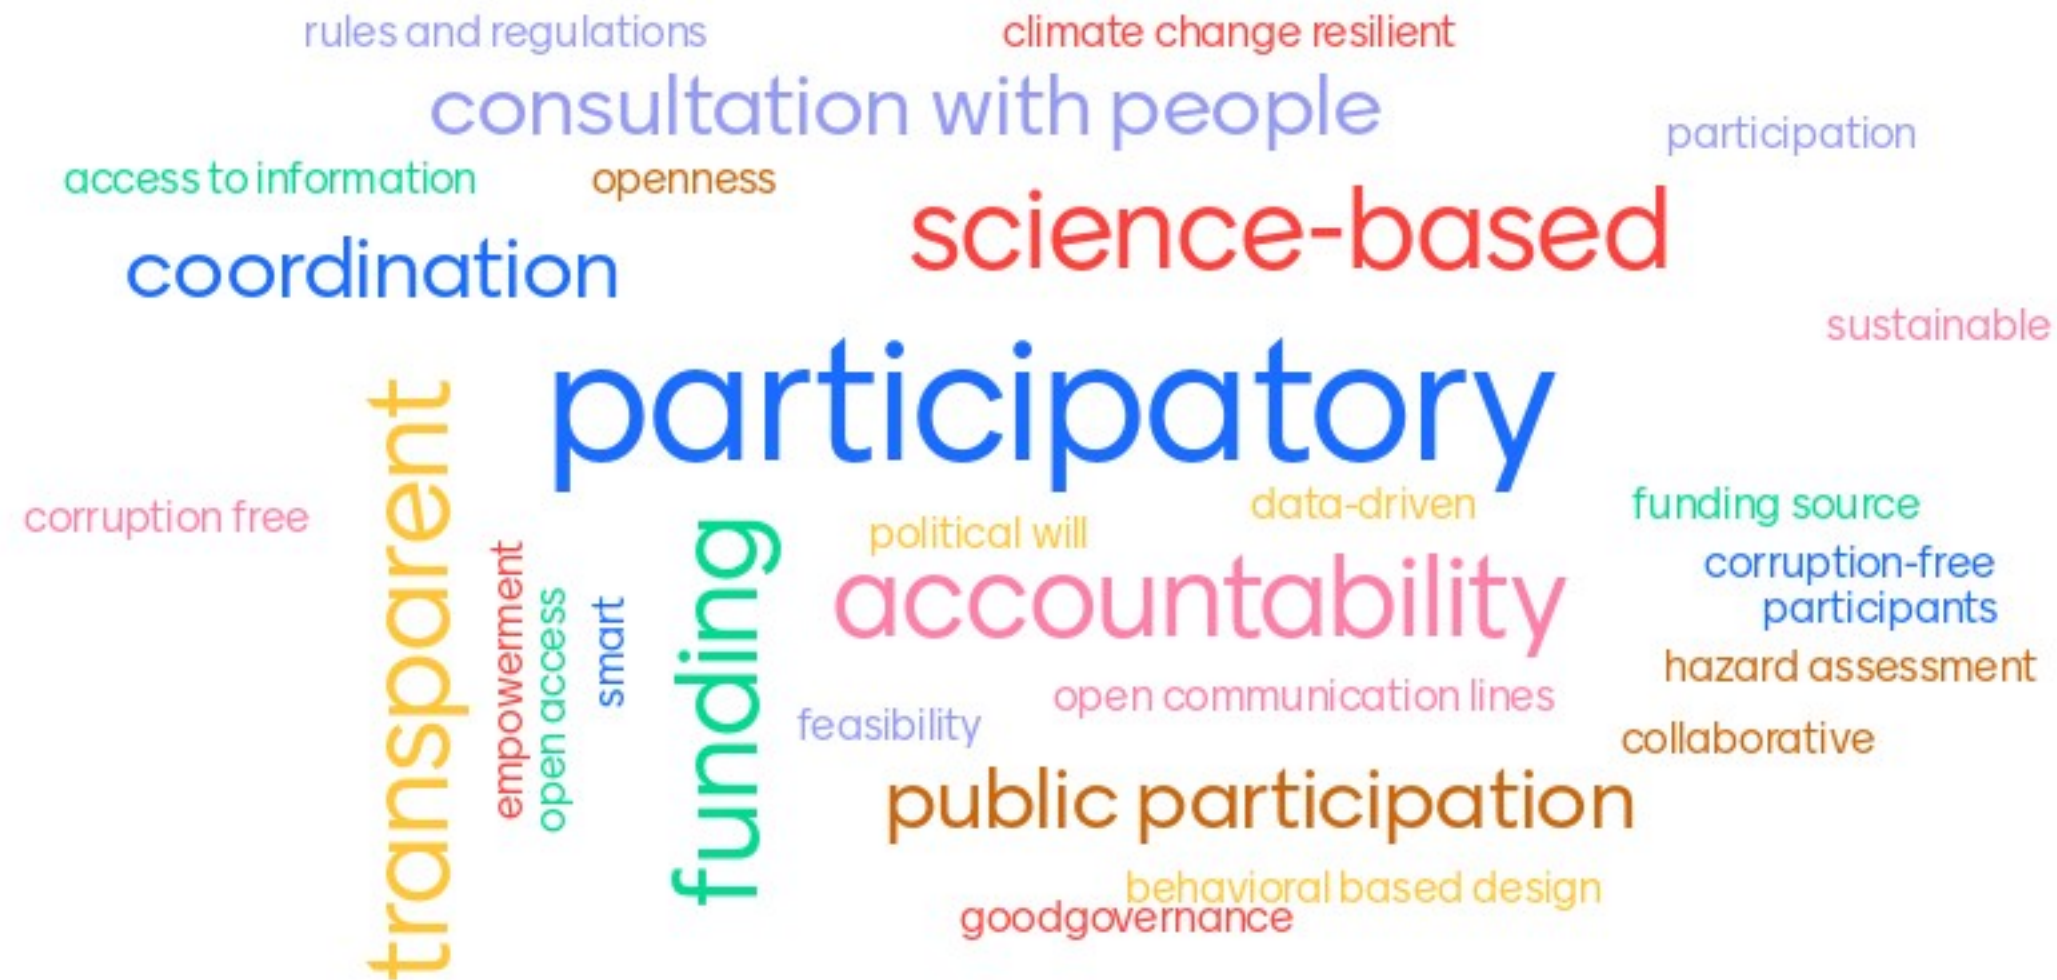

Supplement: s1 [file s1]
